# Supplementary material
Source: publisher figshare collection journal article supplement (https://acs.figshare.com/ndownloader/files/5837343)
Supplement: Supplementary file 1 [file 5837343]

## Organic Letters

### Supporting Information to Accompany:

#### Isoapoptolidin: Structure and Activity of the Ring Expanded Isomer of Apoptolidin

Paul Wender,\* Aaron V. Gulledge, Orion D. Jankowski, and Haruo Seto

*Department of Chemistry, Stanford University*

*Stanford, California 94305-5080, USA*

#### Data for isoapoptolidin (2):

$[\alpha]_D = -187$  (c=0.41, MeOH)

UV/Vis  $\lambda_{\text{max}} = 234$  (39,500), 304 (19,400)

Melting Point: 134 – 136 °C

Mass Spectrum (+ESMS)  $m/z$  1151.7 (1151.6 calculated for  $\text{C}_{58}\text{H}_{96}\text{O}_{21} + \text{Na}$ )

$^1\text{H}$  NMR (500 MHz) spectrum of isoapoptolidin in  $\text{CD}_3\text{OD}$ :

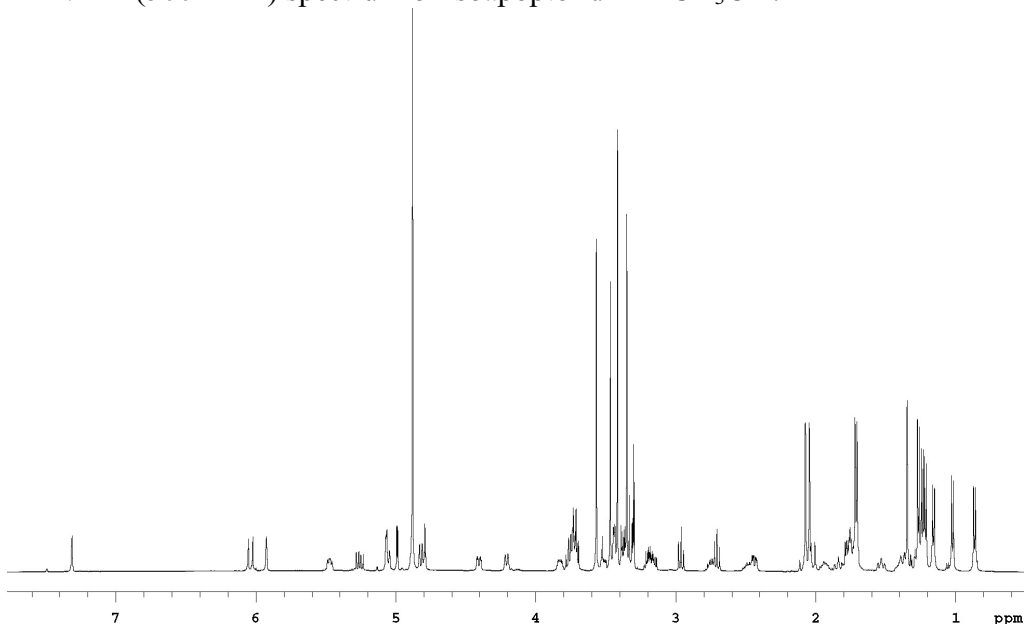

**$^{13}\text{C}$  NMR (100 MHz) spectrum of isoapoptolidin in  $\text{CD}_3\text{OD}$ :**

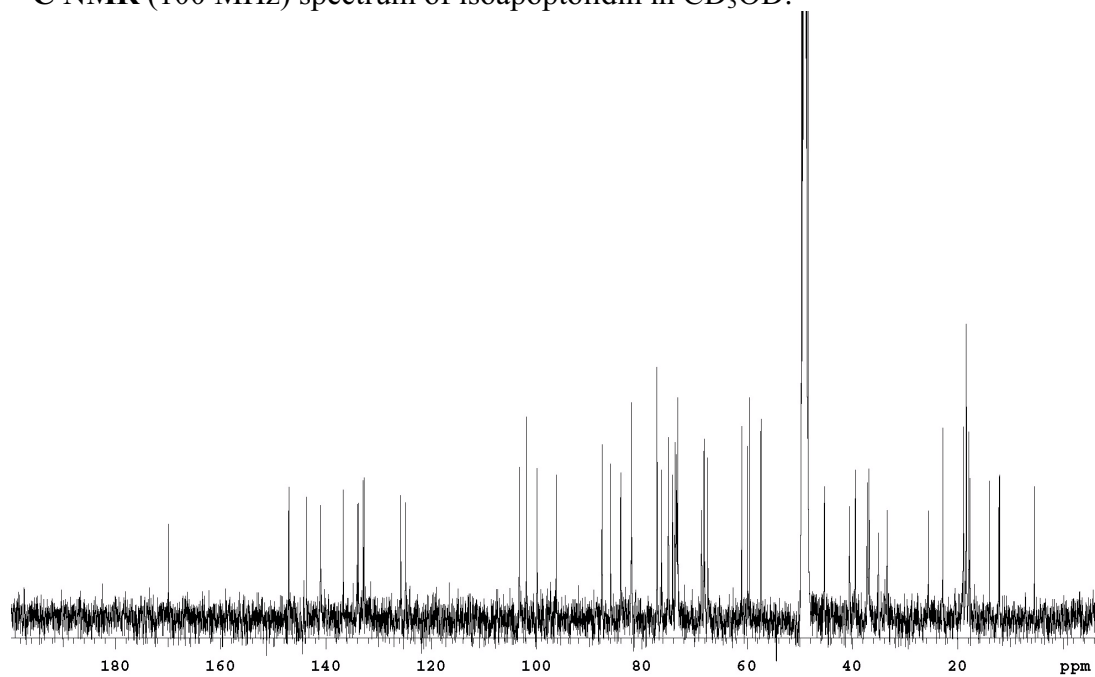

**FTIR spectrum of isoapoptolidin (thin film)**

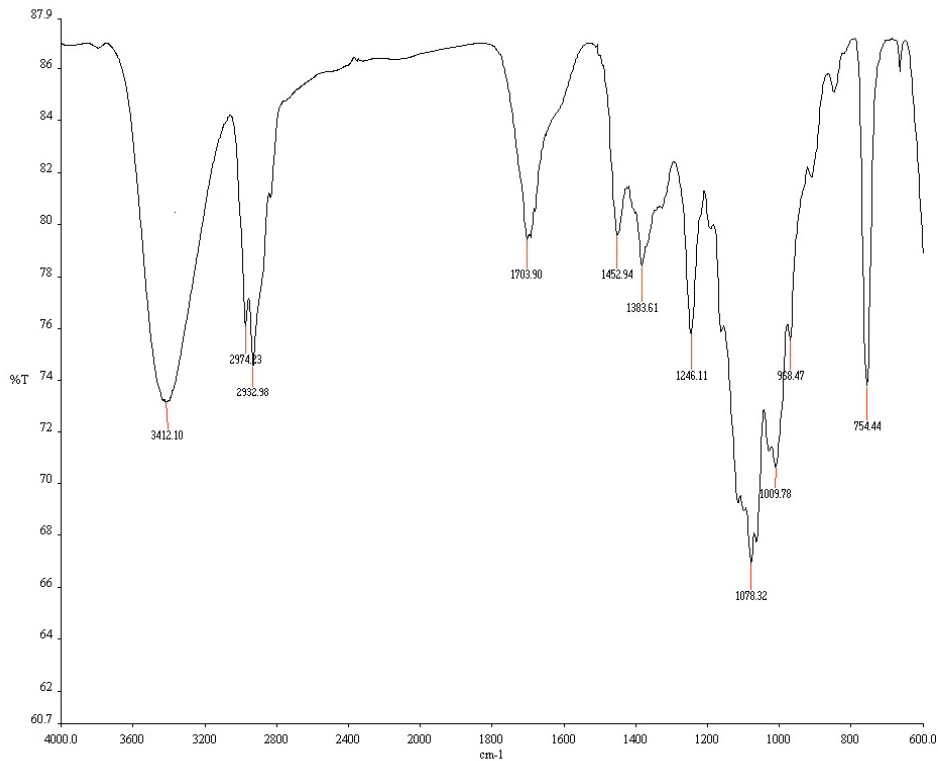

**DQ-COSY (500 MHz) spectrum of isoapoptolidin in CD<sub>3</sub>OD:**

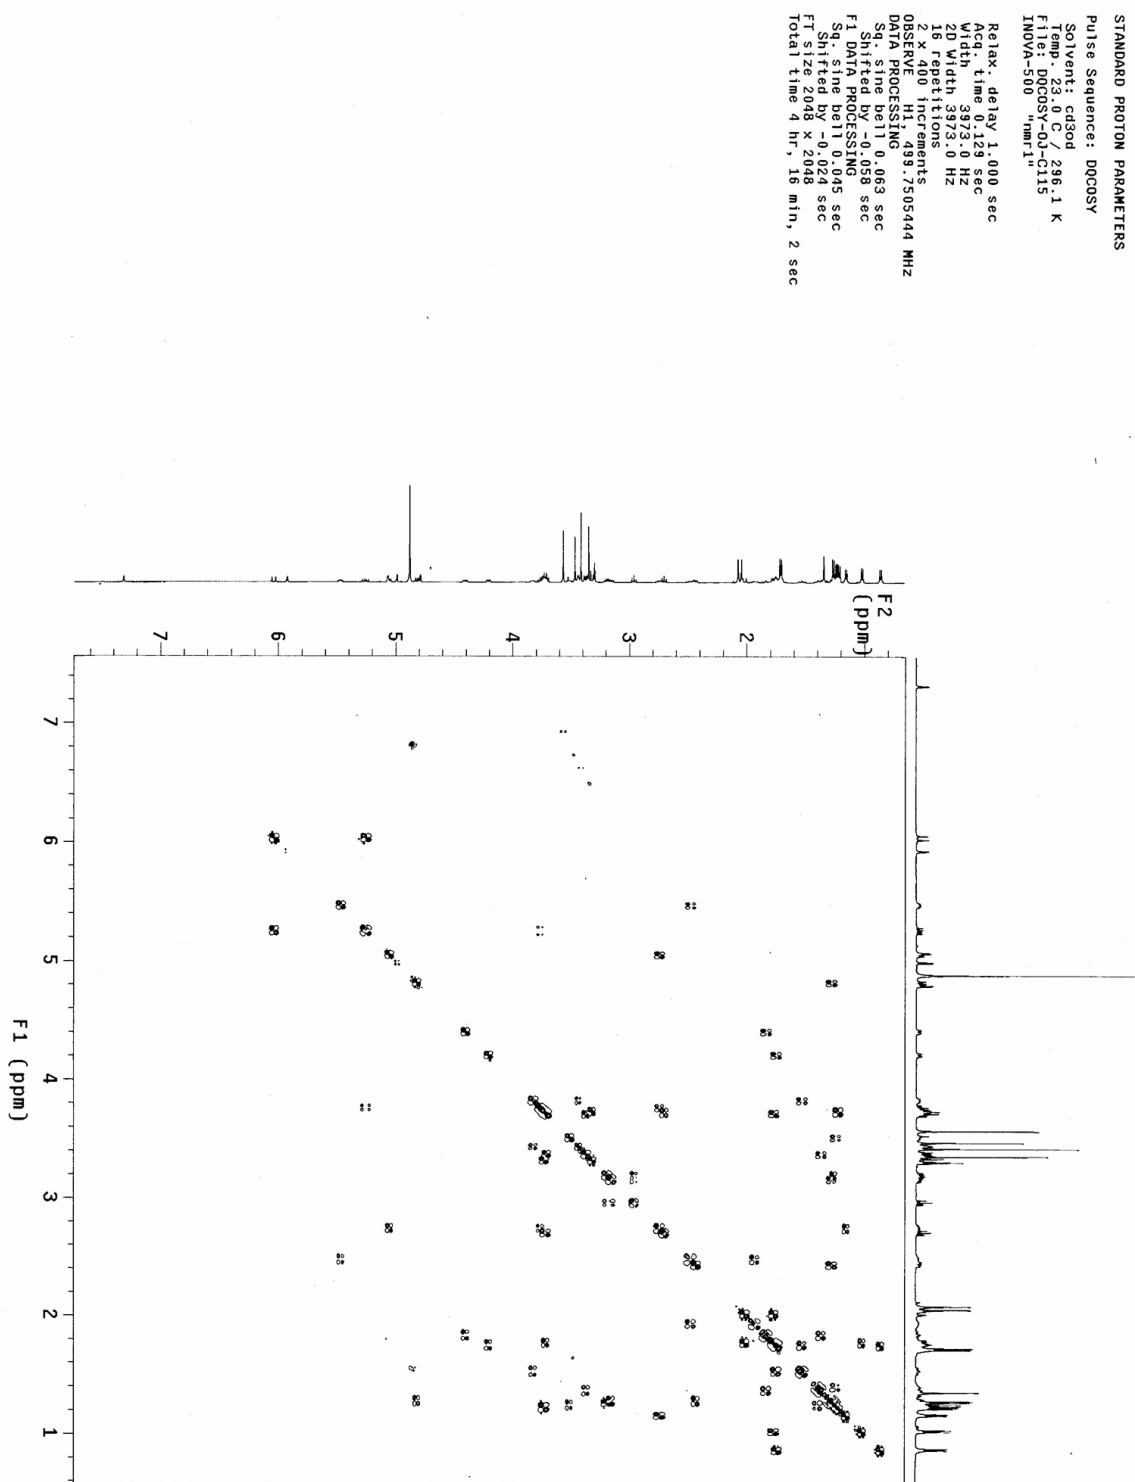

# HSQC (500 MHz) spectrum of isoapoptolidin in CD<sub>3</sub>OD:

Sample directory:  
Pulse Sequence: ghsqc  
Solvent: cd3od  
Temp: 24.0 C / 297.1 K  
File: ghsqc-03-c15-2  
INOVA-500 "nmr1"

Relax. delay 1.000 sec  
Acq. time 0.254 sec  
Width 4026.0 Hz  
2D Width 23753.0 Hz  
2 Repetitions  
2 F20 increments  
OBSERVE H1 489.7505454 MHz  
DECOUPLE C13 125.6724050 MHz  
Power 44 dB  
on during acquisition  
off during delay  
W40 testprobe modulated  
DATA PROCESSING  
Sf 310.063 sec  
Shifted by -0.051 sec  
F1 DATA PROCESSING  
Sf. sine bell 0.006 sec  
Shifted by -0.004 sec  
FT size 2048 x 2048  
Total time 0 min, -1 sec

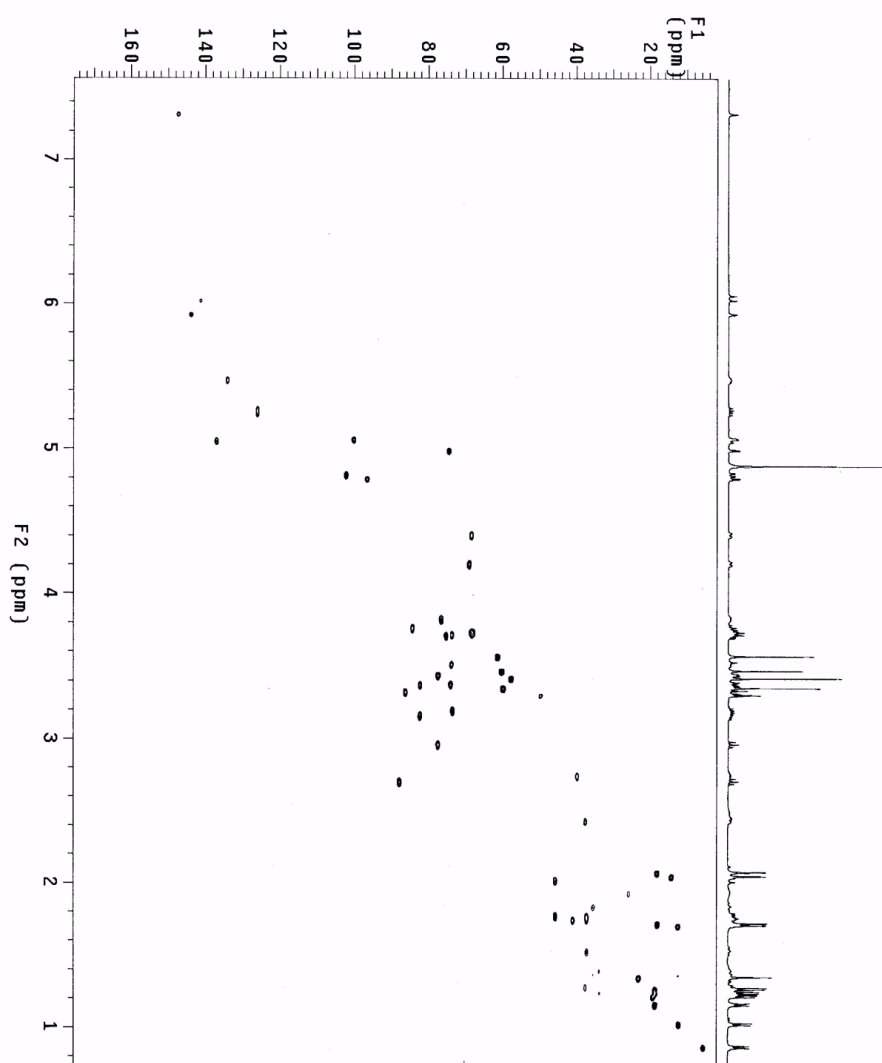

HMBC (500 MHz) spectrum of isoapoptolidin in CD<sub>3</sub>OD:

Sample directory: 11uc\_26oct2000-15:31:42\_26oct2000  
Pulse Sequence: ghmBC  
Solvent: cd3od  
Ambient temperature  
File: ghmBC-03-C15-2  
INOVA-500 "nmr1"  
Relax. delay 1.000 sec  
Acq. time 0.254 sec  
Width 4026.0 Hz  
2D width 23753.0 Hz  
8 repetitions  
4000000000  
OBSERVE H1 499.7505474 MHz  
DATA PROCESSING  
Sf. sine bell 0.223 sec  
Shifted by -0.223 sec  
Sf. sine bell 0.007 sec  
Shifted by -0.008 sec  
F1 size 2048 x 1200  
Total time 0 min, -1 sec

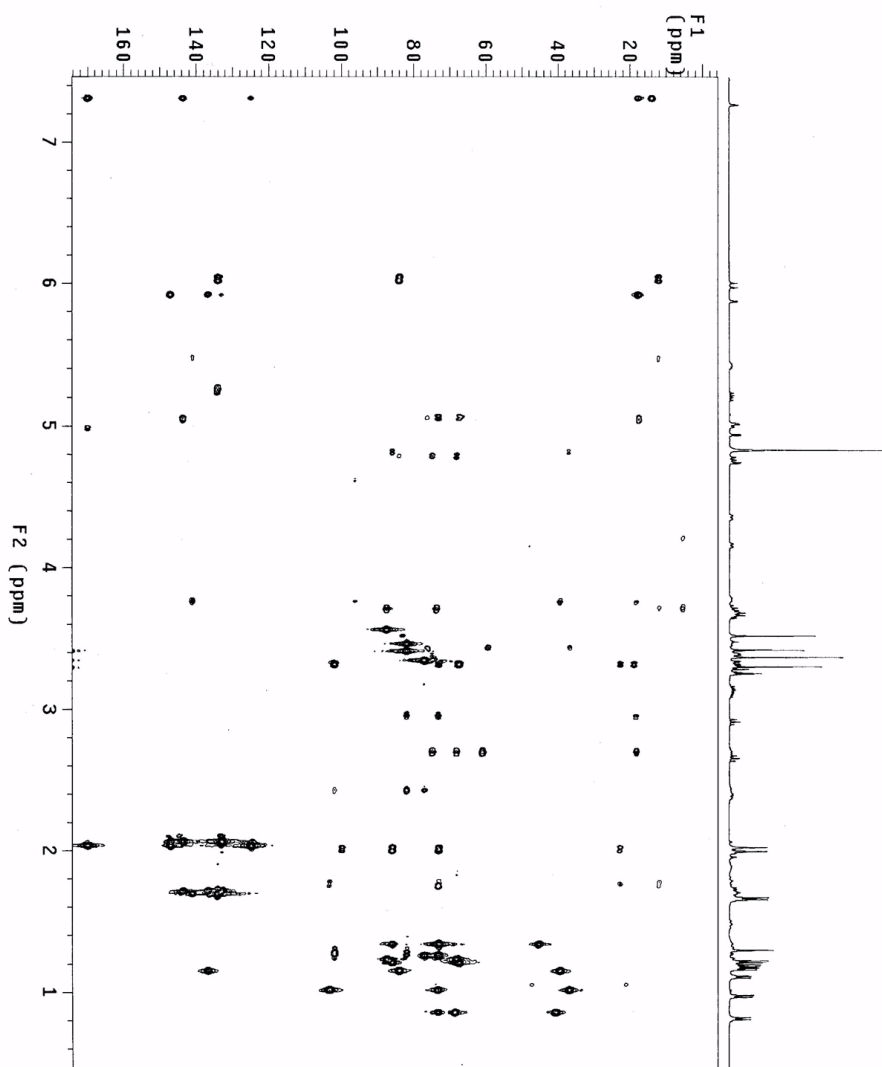

**ROESY (500 MHz) spectrum of isoapoptolidin in CD<sub>3</sub>OD:**

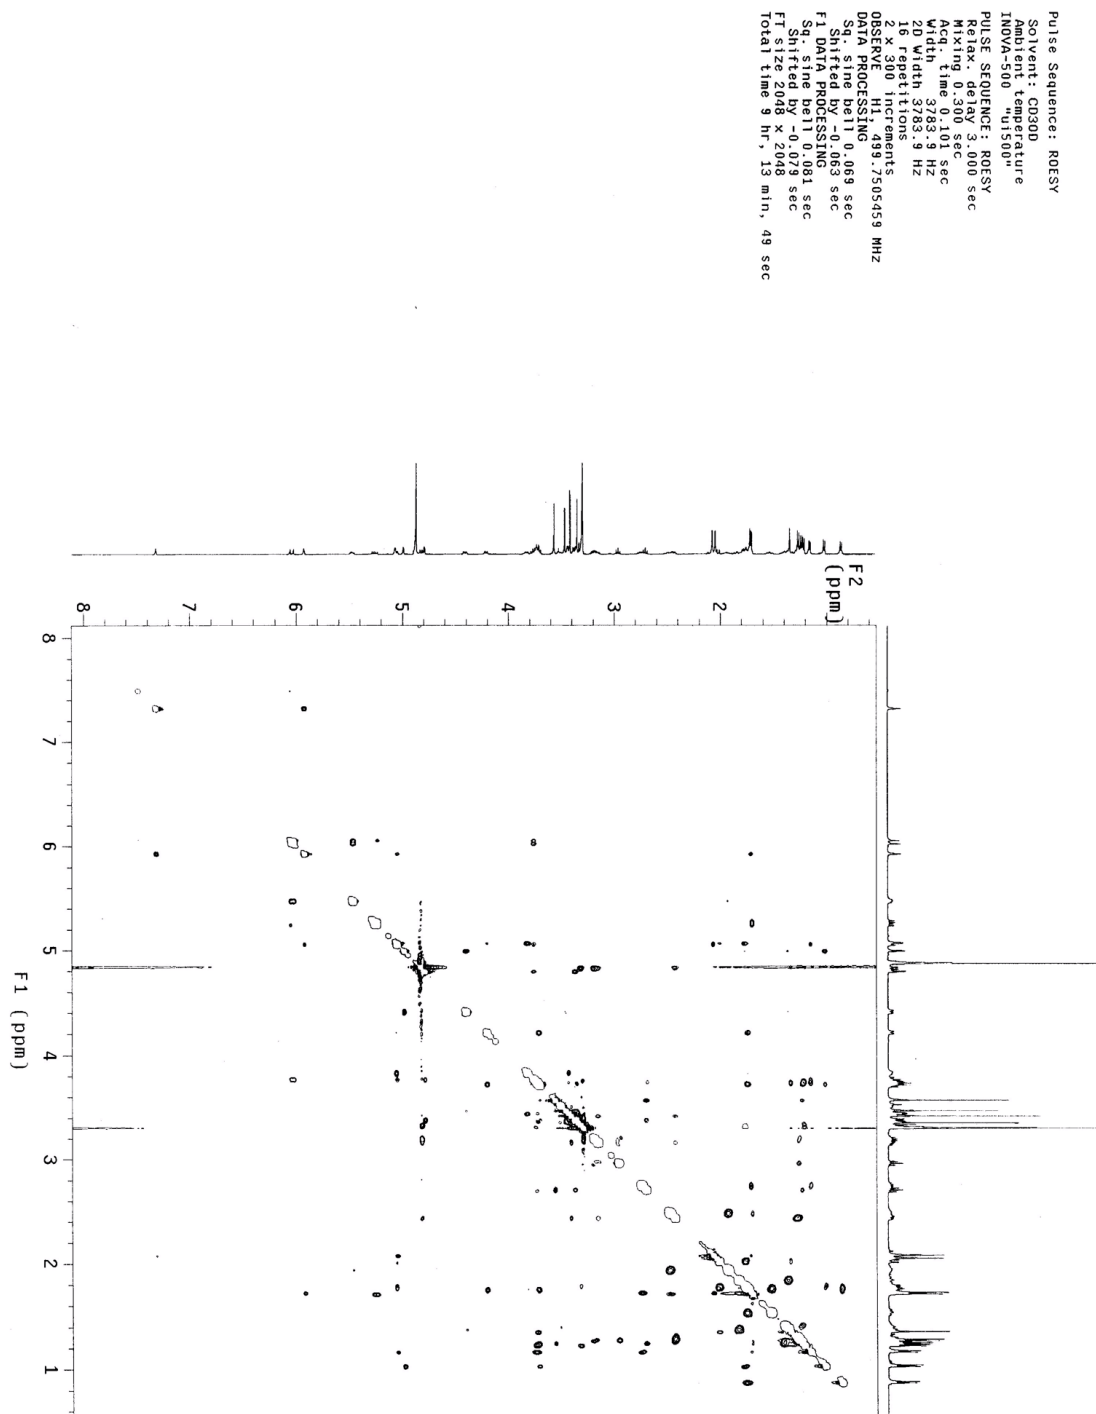

ROESY correlations used in isoapoptolidin solution conformation calculations:

| <i>H(F1)</i> | <i>H(F2)</i> | ROESY Volume  |
|--------------|--------------|---------------|
| 3            | 15b          | <i>Weak</i>   |
| 3            | 18b          | <i>Weak</i>   |
| 5            | 3            | <i>Strong</i> |
| 6-Me         | 8            | <i>Strong</i> |
| 7            | 5            | <i>Strong</i> |
| 8            | 10           | <i>Strong</i> |
| 9            | 11           | <i>Strong</i> |
| 9            | 7            | <i>Strong</i> |
| 12-Me        | 10           | <i>Strong</i> |
| 12-Me        | 14b          | <i>Medium</i> |
| 13           | 11           | <i>Strong</i> |
| 14a          | 13           | <i>Strong</i> |
| 15b          | 13           | <i>Strong</i> |
| 15b          | 16           | <i>Strong</i> |
| 16           | 13           | <i>Medium</i> |
| 17           | 19           | <i>Medium</i> |
| 17-Me        | 19           | <i>Weak</i>   |
| 18a          | 19           | <i>Strong</i> |
| 18a          | 20           | <i>Medium</i> |
| 19           | 20           | <i>Strong</i> |
| 22           | 20           | <i>Medium</i> |
| 22           | 2-Me         | <i>Weak</i>   |
| 22-Me        | 20           | <i>Medium</i> |

Calculated solution conformations for the core structures of isoapoptolidin (upper overlaid structure) and apoptolidin. Both calculations were performed with Macromodel 7.0 using similar parameters.

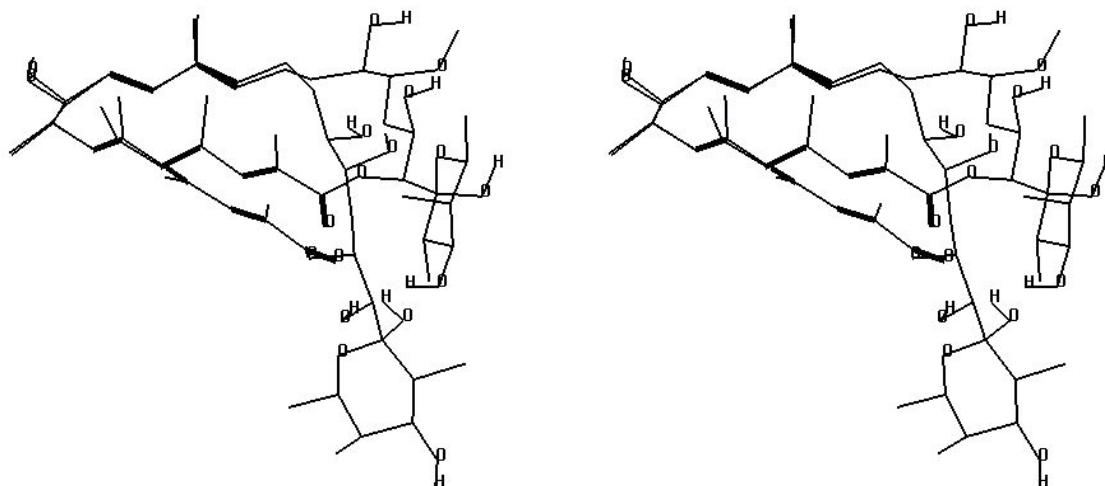



HPLC trace of purified isoapoptolidin (reverse-phase):

Sample: ISOAPOPTOLIDIN  
4mg/ml MeOH Solution  
5uL Inject Volume  
254 nm  
Alltech Altima C18 5u  
150mm x 4.6mm

Method: Anal RP 40-84%  
Inject Vol: 5  
Internal Std: 0  
Sampling Int: 0.1 Seconds

Data:

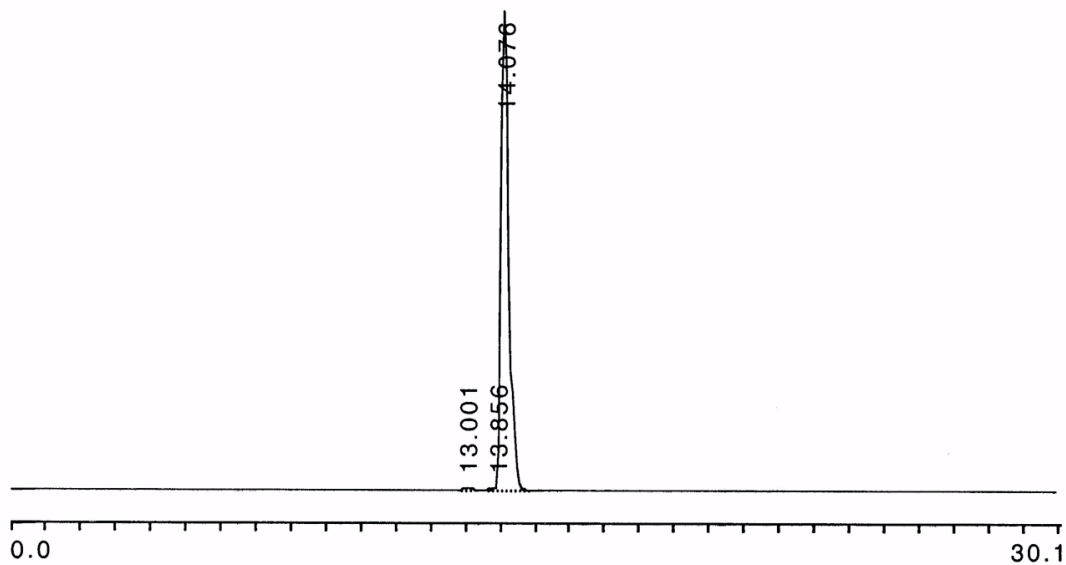

Analysis: Channel A

| Peak No.   | Time   | Type | Height( $\mu$ V) | Area( $\mu$ V-sec) | Area%  |
|------------|--------|------|------------------|--------------------|--------|
| 1          | 13.001 | N    | 3405             | 27885              | 0.699  |
| 2          | 13.856 | N1   | 1446             | 11893              | 0.298  |
| 3          | 14.076 | N2   | 332585           | 3946876            | 99.002 |
| Total Area |        |      |                  | 3986654            | 99.999 |

**ATPase inhibition assay.** The mitochondrial ATPase inhibition assay has been modified from the original published procedure to be compatible with a 96-well plate-reader format. Numerical values for ATPase inhibition are comparable to the original procedure.

All solutions are prepared using deionized water. A reaction buffer (solution A) is prepared containing the following components:  $\text{MgCl}_2 \cdot 6\text{H}_2\text{O}$  (3.3 mM), antimycin A (2  $\mu\text{g}/\text{ml}$ ) and Tris (50 mM). The buffer is adjusted to  $\text{pH} = 8$  using HCl (1.0 M). A separate solution (solution B) is prepared containing lactate dehydrogenase (500 U/ml) and pyruvate kinase (250 U/ml). A third solution (solution C) is prepared containing phosphoenol pyruvate (100 mM) and NADH (30 mM). A fourth solution (Solution D) is prepared containing ATP (50 mM).

Because the activity of ATPase in isolated mitochondria varies by batch, the amount used is calibrated to achieve a specified turnover rate for the null control. In general, all NADH should be consumed in the null control within 10 to 20 minutes of the initiation of the reaction. The volume of mitochondria suspension required to achieve this should not be more than 5% of the total reaction volume.

The total reaction volume for a single well in a 96-well plate is set to be 200  $\mu\text{L}$ . A series of dilutions of the compound to be tested is first added to each of the relevant wells, along with 5  $\mu\text{L}$  of solution D. The reaction mixture is then prepared separately corresponding to 180  $\mu\text{L}$  of solution A, 2  $\mu\text{L}$  of solution B, and 5  $\mu\text{L}$  of solution C per well used. A sufficient amount of isolated mitochondria is then added to achieve the desired reaction rate. The solution is thoroughly mixed, then transferred to individual wells to bring the total well volume to 200  $\mu\text{L}$ . The absorbance at each well is measured at 360 nm in 15 second intervals for a total of 25 minutes using a VERSAmax tunable microplate reader (Molecular Devices).

After the data acquisition is complete, the reaction rate is calculated for each well over its linear range. This rate is then normalized with respect to the reaction rate for the null well, and plotted as a function of concentration.  $\text{IC}_{50}$  values are reported as the concentration where the inhibited rate is 50% of the uninhibited rate. All data-points are collected in triplicate, and averaged after rates have been calculated.
